# Supplementary material for: The genetic diversity and structure of indica rice in China as detected by single nucleotide polymorphism analysis
Source: PubMed Central journal article supplement (PMC4793538; doi:10.1186/s12863-016-0361-x), 2016-03-15
Supplement: 12863_2016_361_MOESM2_ESM.pdf [file 12863_2016_361_MOESM2_ESM.pdf]

**Table S2** Polymorphism among sub-groups at the chromosome level

| Chromosome | Total | Local varieties |      | Introduced varieties |      | Improved varieties |      |
|------------|-------|-----------------|------|----------------------|------|--------------------|------|
|            |       | Mono            | Poly | Mono                 | Poly | Mono               | Poly |
| 1          | 592   | 79              | 513  | 85                   | 507  | 58                 | 534  |
| 2          | 555   | 61              | 494  | 67                   | 488  | 56                 | 499  |
| 3          | 441   | 57              | 384  | 60                   | 381  | 28                 | 413  |
| 4          | 397   | 36              | 361  | 43                   | 354  | 19                 | 378  |
| 5          | 268   | 39              | 229  | 43                   | 225  | 10                 | 258  |
| 6          | 393   | 47              | 346  | 61                   | 332  | 67                 | 326  |
| 7          | 408   | 79              | 329  | 84                   | 324  | 69                 | 339  |
| 8          | 373   | 52              | 321  | 53                   | 320  | 36                 | 337  |
| 9          | 300   | 34              | 266  | 42                   | 258  | 35                 | 265  |
| 10         | 264   | 55              | 209  | 54                   | 210  | 51                 | 213  |
| 11         | 681   | 29              | 652  | 46                   | 635  | 86                 | 595  |
| 12         | 388   | 29              | 359  | 29                   | 359  | 24                 | 364  |
